# Supplementary material for: A layered iodocuprate based on a 3D cationic supramolecular network of dimeric Co(ii) complexes by offset face-to-face interactions
Source: Royal Society of Chemistry journal article supplement (doi:10.1039/b820391a), 2009-01-01
Supplement: b820391a.pdf [file b820391a.pdf]

Supporting Information For

## A Layered Iodocuprate Basis on a 3D Cationic Supramolecular Network of Dimeric Co(II) Complexes by Offset Face-to-Face Interactions

Qiuyan Li and Yunlong Fu\*

Figure. S1 Thermogravimetric curve

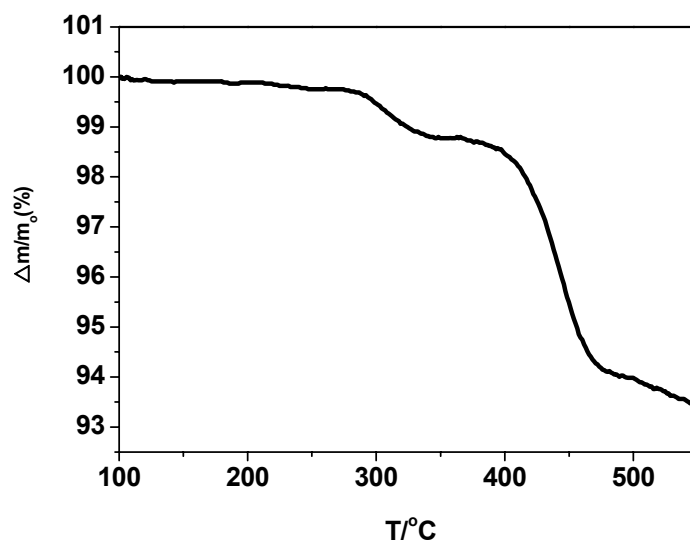

Figure. S2 FT-IR spectra

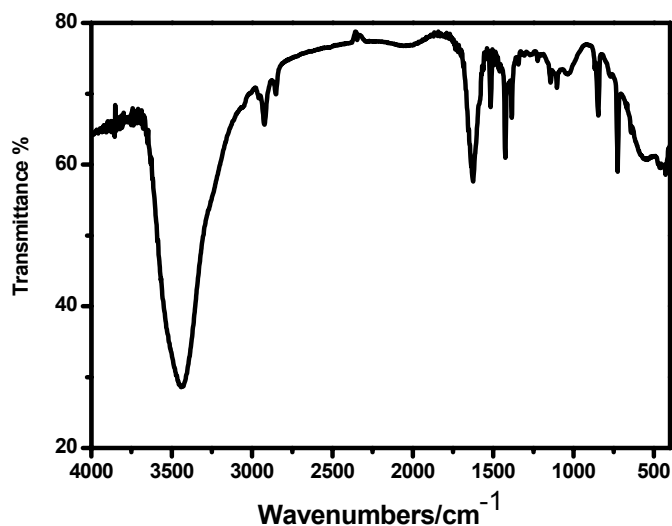

**Figure. S3 Experimental and simulated powder XRPD patterns**

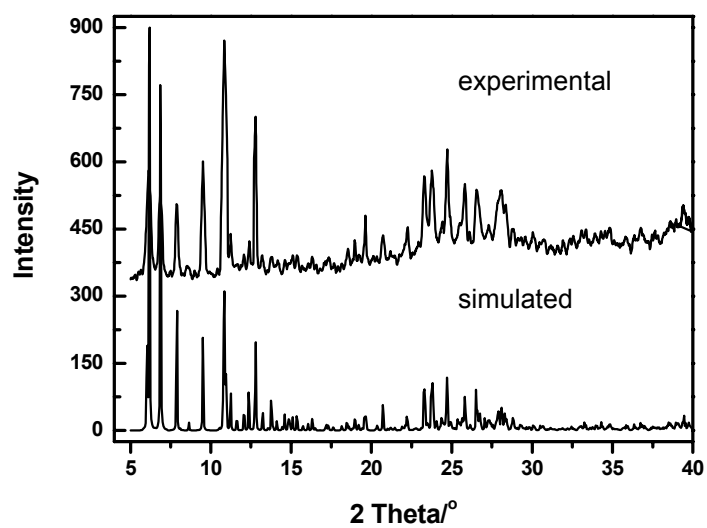

**Figure. S4 UV-Vis spectra**

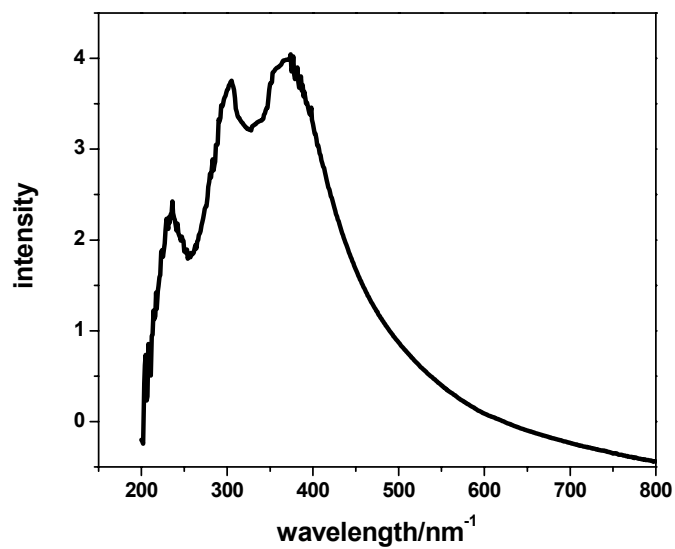

**Figure. S5** The cation  $[\text{Co}(\text{phen})_2(\mu\text{-Cl})]_2^{2+}$  (Cl atom is labeled as Cl(1) and Cl(2)) interact with four neighboring cations via OFF interactions depicted by arrows. All atoms in each cation have the same symmetry codes denoted as A, B, C and D respectively. Symmetry codes: A= $-x+1, -y, -z$ ; B= $x, -y+1/2, z-1/2$ ; C= $-x, -y, -z$ ; D= $x, -y+1/2, z+1/2$ . Hydrogen atoms are omitted for clarity.

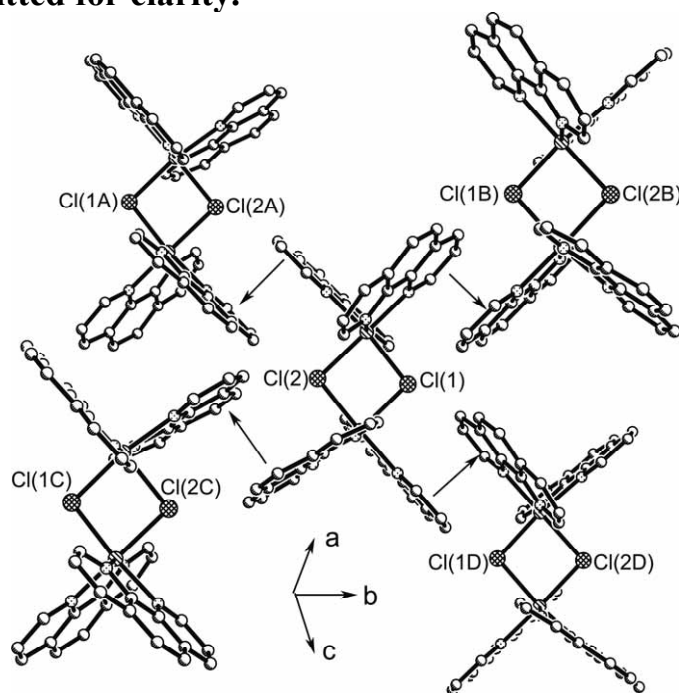

**Figure. S6** The Cu(I) coordination environments with atom labeling (30% probability ellipsoids). Symmetry codes: I(7A):  $x, -y+3/2, z+1/2$ ; I(8A):  $x, -y+3/2, z+1/2$ ; I(2A):  $-x, -y+1, -z$ ; I(3A):  $-x, -y+1, -z$ .

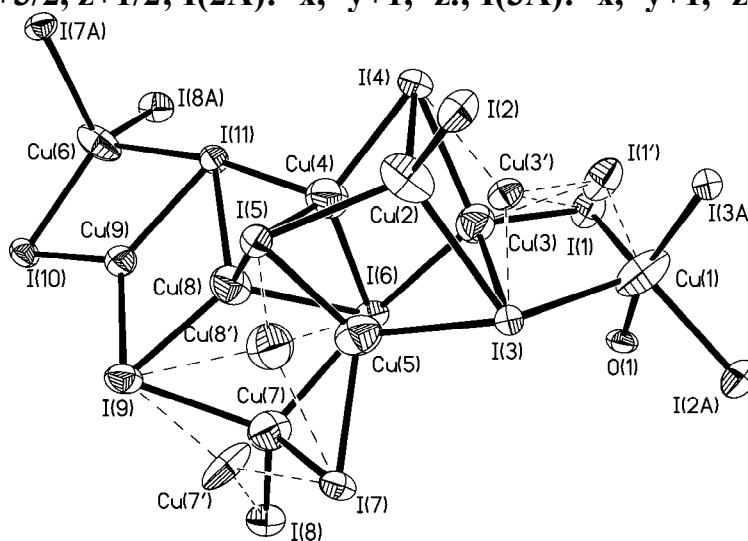

**Figure. S7 EPR spectra**

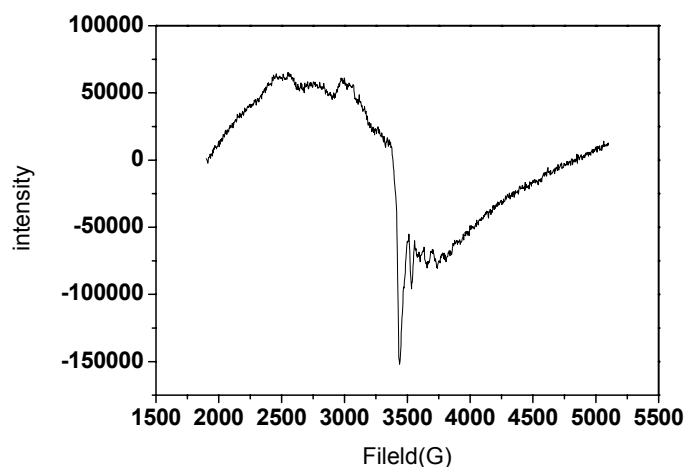

**Table S2. Stacking parameters of OFF interactions between adjacent phens**

| Cg(I)-Cg(J)              | dc-c (Å) | d $\pi,\pi$ (Å) | $\alpha$ (°) |
|--------------------------|----------|-----------------|--------------|
| Cg(1)-Cg(2) <sup>a</sup> | 4.816    | 3.433           | 0.0          |
| Cg(3)-Cg(4) <sup>b</sup> | 4.244    | 3.511           | 7.1          |
| Cg(5)-Cg(6) <sup>c</sup> | 5.511    | 3.373           | 0.0          |

Cg(I)=plane I;  $\alpha$  = dihedral angle between planes I and J; dc-c = centroid-centroid distance of planes; d $\pi,\pi$ = stacking distance defined as the centroid  $\rightarrow$  normal to the plane averaged distance; definition of phen:

Cg(1)= N(5), N(6), C(1), C(2), C(3)  $\rightarrow$  C(11), C(12)

Cg(2)<sup>a</sup> = N(5), N(6), C(1), C(2), C(3)  $\rightarrow$  C(11), C(12);

Cg(3)= N(1), N(2), C(37), C(38), C(39)  $\rightarrow$  C(47), C(48)

Cg(4)<sup>b</sup> = N(7), N(8), C(13), C(14), C(15)  $\rightarrow$  C(23), C(24);

Cg(5)= N(3), N(4), C(25), C(26), C(27)  $\rightarrow$  C(35), C(36)

Cg(6)<sup>c</sup> = N(3), N(4), C(25), C(26), C(27)  $\rightarrow$  C(35), C(36);

Symmetry codes: a=-x, -y, -z; b= x, -y+1/2, z-1/2; c =-x+1, -y, -z.

**Table S1. Selected bond distances and angles (Å, °)**

| Bonds             | Bonds-Distances | Bonds            | Bonds-Distances |
|-------------------|-----------------|------------------|-----------------|
| I(1)-I(1')        | 0.632(8)        | I(10)-Cu(9)      | 2.527(2)        |
| I(1)-Cu(3')       | 2.487(9)        | I(10)-Cu(6)      | 2.561(2)        |
| I(1)-Cu(3)        | 2.580(7)        | I(11)-Cu(9)      | 2.561(2)        |
| I(1)-Cu(1)        | 2.582(7)        | I(11)-Cu(4)      | 2.676(3)        |
| I(1')-Cu(3')      | 2.506(11)       | I(11)-Cu(8)      | 2.681(4)        |
| I(1')-Cu(1)       | 2.636(8)        | I(11)-Cu(6)      | 2.915(3)        |
| I(1')-Cu(3)       | 2.783(9)        | Cu(1)-I(2)#1     | 2.561(3)        |
| I(2)-Cu(1)#1      | 2.561(3)        | Cu(1)-O(1)       | 2.573(9)        |
| I(2)-Cu(2)        | 2.564(3)        | Cu(1)-Cu(3')     | 2.741(8)        |
| I(3)-Cu(3)        | 2.699(4)        | Cu(1)-I(3)#1     | 2.747(3)        |
| I(3)-Cu(3')       | 2.708(7)        | Cu(2)-Cu(3')     | 2.623(7)        |
| I(3)-Cu(5)        | 2.733(3)        | Cu(2)-Cu(3)      | 2.790(5)        |
| I(3)-Cu(1)#1      | 2.747(3)        | Cu(2)-Cu(4)      | 2.798(4)        |
| I(3)-Cu(1)        | 2.839(4)        | Cu(3)-Cu(3')     | 0.845(7)        |
| I(3)-Cu(2)        | 2.920(4)        | Cu(3)-Cu(4)      | 2.667(5)        |
| I(4)-Cu(3')       | 2.485(7)        | Cu(3)-Cu(5)      | 3.025(5)        |
| I(4)-Cu(4)        | 2.555(3)        | Cu(4)-Cu(8)      | 2.306(4)        |
| I(4)-Cu(2)        | 2.631(3)        | Cu(4)-Cu(5)      | 2.681(4)        |
| I(4)-Cu(3)        | 2.688(4)        | Cu(4)-Cu(8')     | 2.866(11)       |
| I(5)-Cu(8')       | 2.470(10)       | Cu(5)-Cu(8')     | 1.586(10)       |
| I(5)-Cu(5)        | 2.675(3)        | Cu(5)-Cu(8)      | 2.725(4)        |
| I(5)-Cu(2)        | 2.707(3)        | Cu(5)-Cu(7)      | 2.952(5)        |
| I(5)-Cu(8)        | 2.748(4)        | Cu(6)-Cu(7')#3   | 2.414(8)        |
| I(5)-Cu(4)        | 2.791(3)        | Cu(6)-I(8)#3     | 2.575(2)        |
| I(6)-Cu(5)        | 2.627(3)        | Cu(6)-I(7)#3     | 2.739(3)        |
| I(6)-Cu(4)        | 2.698(3)        | Cu(6)-Cu(7)#3    | 2.793(5)        |
| I(6)-Cu(8)        | 2.904(4)        | Cu(6)-Cu(9)      | 2.815(3)        |
| I(6)-Cu(8')       | 2.904(10)       | Cu(7)-Cu(7')     | 1.045(13)       |
| I(6)-Cu(3)        | 2.905(5)        | Cu(7)-Cu(8')     | 2.089(12)       |
| I(6)-Cu(7)        | 2.909(5)        | Cu(7)-Cu(8)      | 2.755(6)        |
| I(7)-Cu(5)        | 2.603(3)        | Cu(7)-Cu(6)#2    | 2.793(5)        |
| I(7)-Cu(7)        | 2.670(5)        | Cu(7')-Cu(6)#2   | 2.414(8)        |
| I(7)-Cu(7')       | 2.707(8)        | Cu(7')-Cu(8')    | 2.503(15)       |
| I(7)-Cu(6)#2      | 2.739(3)        | Cu(8)-Cu(8')     | 1.567(11)       |
| I(7)-Cu(8')       | 2.745(10)       | Cu(8)-Cu(9)      | 2.627(4)        |
| I(8)-Cu(7)        | 2.555(5)        | Co(1)-N(1)       | 2.129(9)        |
| I(8)-Cu(6)#2      | 2.575(2)        | Co(1)-N(4)       | 2.130(9)        |
| I(8)-Cu(7')       | 2.609(7)        | Co(1)-N(2)       | 2.141(9)        |
| I(9)-Cu(7')       | 2.395(7)        | Co(1)-N(3)       | 2.142(9)        |
| I(9)-Cu(8)        | 2.530(4)        | Co(1)-Cl(1)      | 2.446(3)        |
| I(9)-Cu(9)        | 2.575(2)        | Co(1)-Cl(2)      | 2.493(3)        |
| I(9)-Cu(7)        | 2.787(5)        | Co(2)-N(5)       | 2.110(9)        |
| I(9)-Cu(8')       | 2.857(10)       | Co(2)-N(7)       | 2.134(10)       |
| Co(2)-N(6)        | 2.149(10)       | Co(2)-N(6)       | 2.149(10)       |
| Co(2)-Cl(1)       | 2.473(3)        | Co(2)-Cl(2)      | 2.474(3)        |
| Co(2)-Cl(2)       | 2.474(3)        |                  |                 |
| Bonds             | Bond-Angles     | Bonds            | Bond-Angles     |
| I(1')-I(1)-Cu(3') | 84.4(13)        | Cu(5)-I(5)-Cu(8) | 60.32(10)       |

|                     |            |                     |            |
|---------------------|------------|---------------------|------------|
| I(1')-I(1)-Cu(3)    | 102.2(14)  | Cu(2)-I(5)-Cu(8)    | 107.51(10) |
| Cu(3')-I(1)-Cu(3)   | 19.08(18)  | Cu(8')-I(5)-Cu(4)   | 65.7(2)    |
| I(1')-I(1)-Cu(1)    | 87.9(13)   | Cu(5)-I(5)-Cu(4)    | 58.72(8)   |
| Cu(3')-I(1)-Cu(1)   | 65.4(2)    | Cu(2)-I(5)-Cu(4)    | 61.18(7)   |
| Cu(3)-I(1)-Cu(1)    | 73.3(2)    | Cu(8)-I(5)-Cu(4)    | 49.21(9)   |
| I(1)-I(1')-Cu(3')   | 81.0(13)   | Cu(5)-I(6)-Cu(4)    | 60.45(9)   |
| I(1)-I(1')-Cu(1)    | 78.2(12)   | Cu(5)-I(6)-Cu(8)    | 58.79(9)   |
| Cu(3')-I(1')-Cu(1)  | 64.4(2)    | Cu(4)-I(6)-Cu(8)    | 48.45(9)   |
| I(1)-I(1')-Cu(3)    | 64.9(12)   | Cu(5)-I(6)-Cu(8')   | 32.8(2)    |
| Cu(3')-I(1')-Cu(3)  | 17.38(18)  | Cu(4)-I(6)-Cu(8')   | 61.4(2)    |
| Cu(1)-I(1')-Cu(3)   | 69.3(2)    | Cu(8)-I(6)-Cu(8')   | 31.3(2)    |
| Cu(1)#1-I(2)-Cu(2)  | 78.66(11)  | Cu(5)-I(6)-Cu(3)    | 66.09(10)  |
| Cu(3)-I(3)-Cu(3')   | 17.97(15)  | Cu(4)-I(6)-Cu(3)    | 56.69(9)   |
| Cu(3)-I(3)-Cu(5)    | 67.68(11)  | Cu(8)-I(6)-Cu(3)    | 100.92(10) |
| Cu(3')-I(3)-Cu(5)   | 82.76(19)  | Cu(8')-I(6)-Cu(3)   | 94.1(2)    |
| Cu(3)-I(3)-Cu(1)#1  | 110.50(12) | Cu(5)-I(6)-Cu(7)    | 64.20(11)  |
| Cu(3')-I(3)-Cu(1)#1 | 93.75(19)  | Cu(4)-I(6)-Cu(7)    | 101.41(12) |
| Cu(5)-I(3)-Cu(1)#1  | 127.59(9)  | Cu(8)-I(6)-Cu(7)    | 56.57(12)  |
| Cu(3)-I(3)-Cu(1)    | 67.59(10)  | Cu(8')-I(6)-Cu(7)   | 42.1(2)    |
| Cu(3')-I(3)-Cu(1)   | 59.17(17)  | Cu(3)-I(6)-Cu(7)    | 129.99(12) |
| Cu(5)-I(3)-Cu(1)    | 129.62(9)  | Cu(5)-I(7)-Cu(7)    | 68.07(12)  |
| Cu(1)#1-I(3)-Cu(1)  | 89.38(9)   | Cu(5)-I(7)-Cu(7')   | 84.9(3)    |
| Cu(3)-I(3)-Cu(2)    | 59.39(10)  | Cu(7)-I(7)-Cu(7')   | 22.4(3)    |
| Cu(3')-I(3)-Cu(2)   | 55.41(15)  | Cu(5)-I(7)-Cu(6)#2  | 128.06(9)  |
| Cu(5)-I(3)-Cu(2)    | 65.46(8)   | Cu(7)-I(7)-Cu(6)#2  | 62.15(11)  |
| Cu(1)#1-I(3)-Cu(2)  | 69.86(8)   | Cu(7')-I(7)-Cu(6)#2 | 52.62(19)  |
| Cu(1)-I(3)-Cu(2)    | 108.50(8)  | Cu(5)-I(7)-Cu(8')   | 34.4(2)    |
| Cu(3')-I(4)-Cu(4)   | 77.9(2)    | Cu(7)-I(7)-Cu(8')   | 45.4(2)    |
| Cu(3')-I(4)-Cu(2)   | 61.61(17)  | Cu(7')-I(7)-Cu(8')  | 54.6(3)    |
| Cu(4)-I(4)-Cu(2)    | 65.28(9)   | Cu(6)#2-I(7)-Cu(8') | 106.0(2)   |
| Cu(3')-I(4)-Cu(3)   | 18.25(17)  | Cu(7)-I(8)-Cu(6)#2  | 65.96(12)  |
| Cu(4)-I(4)-Cu(3)    | 61.08(11)  | Cu(7)-I(8)-Cu(7')   | 23.3(3)    |
| Cu(2)-I(4)-Cu(3)    | 63.27(11)  | Cu(6)#2-I(8)-Cu(7') | 55.51(19)  |
| Cu(8')-I(5)-Cu(5)   | 35.6(2)    | Cu(7')-I(9)-Cu(8)   | 81.7(4)    |
| Cu(8')-I(5)-Cu(2)   | 102.9(2)   | Cu(7')-I(9)-Cu(9)   | 125.7(3)   |
| Cu(5)-I(5)-Cu(2)    | 69.33(10)  | Cu(8)-I(9)-Cu(9)    | 61.93(9)   |
| Cu(8')-I(5)-Cu(8)   | 34.4(2)    | Cu(7')-I(9)-Cu(7)   | 21.6(3)    |
| Cu(9)-I(10)-Cu(6)   | 67.19(8)   | Cu(3')-Cu(2)-I(3)   | 58.20(16)  |
| Cu(9)-I(11)-Cu(4)   | 111.02(8)  | I(4)-Cu(2)-I(3)     | 114.24(10) |
| Cu(9)-I(11)-Cu(8)   | 60.10(9)   | I(5)-Cu(2)-I(3)     | 103.26(9)  |
| Cu(4)-I(11)-Cu(8)   | 51.01(10)  | Cu(3)-Cu(2)-I(3)    | 56.36(10)  |
| Cu(9)-I(11)-Cu(6)   | 61.48(6)   | Cu(4)-Cu(2)-I(3)    | 97.09(11)  |
| Cu(4)-I(11)-Cu(6)   | 171.06(8)  | Cu(3')-Cu(3)-I(1)   | 74.3(6)    |
| Cu(8)-I(11)-Cu(6)   | 121.54(9)  | Cu(3')-Cu(3)-Cu(4)  | 119.4(6)   |
| I(2)#1-Cu(1)-O(1)   | 62.8(2)    | I(1)-Cu(3)-Cu(4)    | 142.5(2)   |
| I(2)#1-Cu(1)-I(1)   | 113.03(17) | Cu(3')-Cu(3)-I(4)   | 67.2(6)    |
| O(1)-Cu(1)-I(1)     | 58.1(2)    | I(1)-Cu(3)-I(4)     | 108.25(18) |
| I(2)#1-Cu(1)-I(1')  | 118.8(2)   | Cu(4)-Cu(3)-I(4)    | 57.01(10)  |
| O(1)-Cu(1)-I(1')    | 70.3(3)    | Cu(3')-Cu(3)-I(3)   | 81.6(6)    |
| I(1)-Cu(1)-I(1')    | 13.86(18)  | I(1)-Cu(3)-I(3)     | 110.6(2)   |
| I(2)#1-Cu(1)-Cu(3') | 157.3(2)   | Cu(4)-Cu(3)-I(3)    | 106.05(14) |
| O(1)-Cu(1)-Cu(3')   | 96.3(3)    | I(4)-Cu(3)-I(3)     | 119.99(15) |
| I(1)-Cu(1)-Cu(3')   | 55.6(2)    | Cu(3')-Cu(3)-I(1')  | 62.4(6)    |

---

|                     |            |                    |            |
|---------------------|------------|--------------------|------------|
| I(1')-Cu(1)-Cu(3')  | 55.5(2)    | I(1)-Cu(3)-I(1')   | 12.82(19)  |
| I(2)#1-Cu(1)-I(3)#1 | 107.82(11) | Cu(4)-Cu(3)-I(1')  | 142.1(2)   |
| O(1)-Cu(1)-I(3)#1   | 165.5(3)   | I(4)-Cu(3)-I(1')   | 97.91(19)  |
| I(1)-Cu(1)-I(3)#1   | 121.85(15) | I(3)-Cu(3)-I(1')   | 111.4(2)   |
| I(1')-Cu(1)-I(3)#1  | 108.32(18) | Cu(3')-Cu(3)-Cu(2) | 69.9(6)    |
| Cu(3')-Cu(1)-I(3)#1 | 94.35(19)  | I(1)-Cu(3)-Cu(2)   | 144.2(2)   |
| I(2)#1-Cu(1)-I(3)   | 115.56(12) | Cu(4)-Cu(3)-Cu(2)  | 61.65(12)  |
| O(1)-Cu(1)-I(3)     | 103.4(2)   | I(4)-Cu(3)-Cu(2)   | 57.38(10)  |
| I(1)-Cu(1)-I(3)     | 106.31(17) | I(3)-Cu(3)-Cu(2)   | 64.25(11)  |
| I(1')-Cu(1)-I(3)    | 111.6(2)   | I(1')-Cu(3)-Cu(2)  | 132.1(2)   |
| Cu(3')-Cu(1)-I(3)   | 58.04(16)  | Cu(3')-Cu(3)-I(6)  | 177.1(7)   |
| I(3)#1-Cu(1)-I(3)   | 90.62(9)   | I(1)-Cu(3)-I(6)    | 107.61(19) |
| I(2)-Cu(2)-Cu(3')   | 119.3(2)   | Cu(4)-Cu(3)-I(6)   | 57.74(11)  |
| I(2)-Cu(2)-I(4)     | 113.84(11) | I(4)-Cu(3)-I(6)    | 109.93(14) |
| Cu(3')-Cu(2)-I(4)   | 56.45(16)  | I(3)-Cu(3)-I(6)    | 99.64(13)  |
| I(2)-Cu(2)-I(5)     | 113.85(11) | I(1')-Cu(3)-I(6)   | 119.2(2)   |
| Cu(3')-Cu(2)-I(5)   | 126.2(2)   | Cu(2)-Cu(3)-I(6)   | 108.17(14) |
| I(4)-Cu(2)-I(5)     | 108.44(11) | Cu(3')-Cu(3)-Cu(5) | 127.0(6)   |
| I(2)-Cu(2)-Cu(3)    | 136.20(15) | I(1)-Cu(3)-Cu(5)   | 146.4(2)   |
| Cu(3')-Cu(2)-Cu(3)  | 17.60(17)  | Cu(4)-Cu(3)-Cu(5)  | 55.78(11)  |
| I(4)-Cu(2)-Cu(3)    | 59.35(10)  | I(4)-Cu(3)-Cu(5)   | 104.44(13) |
| I(5)-Cu(2)-Cu(3)    | 108.67(13) | I(3)-Cu(3)-Cu(5)   | 56.70(9)   |
| I(2)-Cu(2)-Cu(4)    | 160.15(16) | I(1')-Cu(3)-Cu(5)  | 157.7(2)   |
| Cu(3')-Cu(2)-Cu(4)  | 71.4(2)    | Cu(2)-Cu(3)-Cu(5)  | 63.36(11)  |
| I(4)-Cu(2)-Cu(4)    | 56.05(8)   | I(6)-Cu(3)-Cu(5)   | 52.53(10)  |
| I(5)-Cu(2)-Cu(4)    | 60.89(9)   | Cu(3)-Cu(3')-I(4)  | 94.6(6)    |
| Cu(3)-Cu(2)-Cu(4)   | 57.00(12)  | Cu(3)-Cu(3')-I(1)  | 86.7(6)    |
| I(2)-Cu(2)-I(3)     | 102.76(10) | I(4)-Cu(3')-I(1)   | 118.3(3)   |
| I(6)-Cu(4)-Cu(2)    | 114.11(12) | Cu(3)-Cu(3')-I(1') | 100.2(7)   |
| I(5)-Cu(4)-Cu(2)    | 57.93(8)   | I(4)-Cu(3')-I(1')  | 111.5(3)   |
| Cu(8)-Cu(4)-Cu(8')  | 33.1(2)    | I(1)-Cu(3')-I(1')  | 14.53(18)  |
| I(4)-Cu(4)-Cu(8')   | 149.4(2)   | Cu(3)-Cu(3')-Cu(2) | 92.5(6)    |
| Cu(3)-Cu(4)-Cu(8')  | 100.4(2)   | I(4)-Cu(3')-Cu(2)  | 61.94(17)  |
| I(11)-Cu(4)-Cu(8')  | 97.7(2)    | I(1)-Cu(3')-Cu(2)  | 179.1(4)   |
| Cu(5)-Cu(4)-Cu(8')  | 33.0(2)    | I(1')-Cu(3')-Cu(2) | 166.3(4)   |
| I(6)-Cu(4)-Cu(8')   | 62.8(2)    | Cu(3)-Cu(3')-I(3)  | 80.4(6)    |
| I(5)-Cu(4)-Cu(8')   | 51.8(2)    | I(4)-Cu(3')-I(3)   | 127.8(3)   |
| Cu(2)-Cu(4)-Cu(8')  | 91.3(2)    | I(1)-Cu(3')-I(3)   | 113.3(3)   |
| Cu(8')-Cu(5)-I(7)   | 77.7(4)    | I(1')-Cu(3')-I(3)  | 120.6(3)   |
| Cu(8')-Cu(5)-I(6)   | 83.2(4)    | Cu(2)-Cu(3')-I(3)  | 66.40(18)  |
| I(7)-Cu(5)-I(6)     | 108.44(11) | Cu(3)-Cu(3')-Cu(1) | 106.0(7)   |
| Cu(8')-Cu(5)-I(5)   | 65.1(4)    | I(4)-Cu(3')-Cu(1)  | 158.7(4)   |
| I(7)-Cu(5)-I(5)     | 113.20(11) | I(1)-Cu(3')-Cu(1)  | 58.9(2)    |
| I(6)-Cu(5)-I(5)     | 118.98(10) | I(1')-Cu(3')-Cu(1) | 60.1(2)    |
| Cu(8')-Cu(5)-Cu(4)  | 79.9(4)    | Cu(2)-Cu(3')-Cu(1) | 121.2(3)   |
| I(7)-Cu(5)-Cu(4)    | 156.33(14) | I(3)-Cu(3')-Cu(1)  | 62.79(17)  |
| I(6)-Cu(5)-Cu(4)    | 61.10(9)   | Cu(8)-Cu(4)-I(4)   | 168.20(18) |
| I(5)-Cu(5)-Cu(4)    | 62.80(9)   | Cu(8)-Cu(4)-Cu(3)  | 128.39(18) |
| Cu(8')-Cu(5)-Cu(8)  | 30.0(4)    | I(4)-Cu(4)-Cu(3)   | 61.91(11)  |
| I(7)-Cu(5)-Cu(8)    | 106.26(13) | Cu(8)-Cu(4)-I(11)  | 64.62(11)  |
| I(6)-Cu(5)-Cu(8)    | 65.70(11)  | I(4)-Cu(4)-I(11)   | 110.56(10) |
| I(5)-Cu(5)-Cu(8)    | 61.17(10)  | Cu(3)-Cu(4)-I(11)  | 146.30(15) |
| Cu(4)-Cu(5)-Cu(8)   | 50.49(10)  | Cu(8)-Cu(4)-Cu(5)  | 65.74(13)  |

---

|                                                                               |                   |                   |            |
|-------------------------------------------------------------------------------|-------------------|-------------------|------------|
| Cu(8')-Cu(5)-I(3)                                                             | 170.7(4)          | I(4)-Cu(4)-Cu(5)  | 119.33(12) |
| I(7)-Cu(5)-I(3)                                                               | 98.61(9)          | Cu(3)-Cu(4)-Cu(5) | 68.90(12)  |
| I(6)-Cu(5)-I(3)                                                               | 106.09(10)        | I(11)-Cu(4)-Cu(5) | 129.98(12) |
| I(5)-Cu(5)-I(3)                                                               | 109.37(11)        | Cu(8)-Cu(4)-I(6)  | 70.45(13)  |
| Cu(4)-Cu(5)-I(3)                                                              | 104.68(11)        | I(4)-Cu(4)-I(6)   | 121.35(12) |
| Cu(8)-Cu(5)-I(3)                                                              | 155.13(14)        | Cu(3)-Cu(4)-I(6)  | 65.56(12)  |
| Cu(8')-Cu(5)-Cu(7)                                                            | 42.9(4)           | I(11)-Cu(4)-I(6)  | 98.75(9)   |
| I(7)-Cu(5)-Cu(7)                                                              | 57.04(11)         | Cu(5)-Cu(4)-I(6)  | 58.45(9)   |
| I(6)-Cu(5)-Cu(7)                                                              | 62.55(12)         | Cu(8)-Cu(4)-I(5)  | 64.44(12)  |
| I(5)-Cu(5)-Cu(7)                                                              | 107.94(14)        | I(4)-Cu(4)-I(5)   | 108.12(10) |
| Cu(4)-Cu(5)-Cu(7)                                                             | 100.74(13)        | Cu(3)-Cu(4)-I(5)  | 109.82(12) |
| Cu(8)-Cu(5)-Cu(7)                                                             | 57.90(13)         | I(11)-Cu(4)-I(5)  | 103.73(10) |
| I(3)-Cu(5)-Cu(7)                                                              | 141.40(14)        | Cu(5)-Cu(4)-I(5)  | 58.49(9)   |
| Cu(8')-Cu(5)-Cu(3)                                                            | 131.9(4)          | I(6)-Cu(4)-I(5)   | 112.62(10) |
| I(7)-Cu(5)-Cu(3)                                                              | 141.52(13)        | Cu(8)-Cu(4)-Cu(2) | 118.72(15) |
| I(6)-Cu(5)-Cu(3)                                                              | 61.38(10)         | I(4)-Cu(4)-Cu(2)  | 58.67(8)   |
| I(5)-Cu(5)-Cu(3)                                                              | 102.99(12)        | Cu(3)-Cu(4)-Cu(2) | 61.35(13)  |
| Cu(4)-Cu(5)-Cu(3)                                                             | 55.32(11)         | I(11)-Cu(4)-Cu(2) | 146.35(14) |
| Cu(8)-Cu(5)-Cu(3)                                                             | 102.21(13)        | Cu(5)-Cu(4)-Cu(2) | 67.88(11)  |
| N(1)-Co(1)-N(4)                                                               | 165.5(4)          | N(8)-Co(2)-N(6)   | 93.6(4)    |
| N(1)-Co(1)-N(2)                                                               | 77.8(3)           | N(5)-Co(2)-Cl(1)  | 94.3(3)    |
| N(4)-Co(1)-N(2)                                                               | 91.8(4)           | N(7)-Co(2)-Cl(1)  | 93.2(3)    |
| N(1)-Co(1)-N(3)                                                               | 91.4(3)           | N(8)-Co(2)-Cl(1)  | 95.4(3)    |
| N(4)-Co(1)-N(3)                                                               | 78.8(3)           | N(6)-Co(2)-Cl(1)  | 168.7(3)   |
| N(2)-Co(1)-N(3)                                                               | 92.0(3)           | N(5)-Co(2)-Cl(2)  | 90.8(3)    |
| N(1)-Co(1)-Cl(1)                                                              | 96.9(3)           | N(7)-Co(2)-Cl(2)  | 175.0(3)   |
| N(4)-Co(1)-Cl(1)                                                              | 94.0(3)           | N(8)-Co(2)-Cl(2)  | 97.1(3)    |
| N(2)-Co(1)-Cl(1)                                                              | 95.2(3)           | N(6)-Co(2)-Cl(2)  | 87.4(3)    |
| N(3)-Co(1)-Cl(1)                                                              | 170.0(3)          | Cl(1)-Co(2)-Cl(2) | 84.69(10)  |
| N(1)-Co(1)-Cl(2)                                                              | 96.1(3)           | Co(1)-Cl(1)-Co(2) | 95.80(10)  |
| N(4)-Co(1)-Cl(2)                                                              | 94.4(3)           | Co(2)-Cl(2)-Co(1) | 94.58(10)  |
| N(2)-Co(1)-Cl(2)                                                              | 173.8(3)          | N(5)-Co(2)-N(7)   | 93.8(4)    |
| N(3)-Co(1)-Cl(2)                                                              | 88.7(3)           | N(5)-Co(2)-N(8)   | 168.0(4)   |
| Cl(1)-Co(1)-Cl(2)                                                             | 84.85(10)         | N(7)-Co(2)-N(8)   | 78.7(4)    |
| N(1)-Co(1)-N(3)                                                               | 91.4(3)           | N(5)-Co(2)-N(6)   | 77.7(4)    |
| N(4)-Co(1)-N(3)                                                               | 78.8(3)           | N(7)-Co(2)-N(6)   | 95.4(4)    |
| N(2)-Co(1)-N(3)                                                               | 92.0(3)           | N(1)-Co(1)-N(4)   | 165.5(4)   |
| N(1)-Co(1)-Cl(1)                                                              | 96.9(3)           | N(1)-Co(1)-N(2)   | 77.8(3)    |
| N(4)-Co(1)-Cl(1)                                                              | 94.0(3)           | N(4)-Co(1)-N(2)   | 91.8(4)    |
| N(2)-Co(1)-Cl(1)                                                              | 95.2(3)           |                   |            |
| Symmetry transformations used to generate equivalent atoms: #1 x,-y+1/2,z+1/2 |                   |                   |            |
| #2 -x+1,-y,-z+1                                                               | #3 x,-y+1/2,z-1/2 |                   |            |
